# Supplementary material for: A Pilot Randomized Trial of Combined Cognitive-Behavioral Therapy and Exercise Training Versus Exercise Training Alone for the Management of Chronic Insomnia in Obstructive Sleep Apnea
Source: bioRxiv or medRxiv preprint supplement (doi:10.1101/2023.03.10.23287115), 2023-03-10
Supplement: Supplementary file [file media-1.pdf]

## SUPPLEMENTARY MATERIAL

### **A Pilot Randomized Trial of Combined Cognitive-Behavioural Therapy and Exercise Training Versus Exercise Training Alone for the Management of Chronic Insomnia in Obstructive Sleep Apnea**

Amanda Cammalleri<sup>1\*</sup>, Aurore A. Perrault<sup>1,2\*</sup>, Alexandra Hillcoat<sup>1</sup>, Emily Carrese-Chacra<sup>3</sup>, Lukia Tarelli<sup>1,2,3</sup>, Rahul Patel<sup>1</sup>, Marc Baltzan<sup>4,7</sup>, Florian Chouchou<sup>1,5</sup>, Thien Thanh Dang-Vu<sup>1,2,6</sup>, Jean-Philippe Gouin<sup>2,3,6</sup>, Veronique Pepin<sup>1,6,7\*\*</sup>

1. *Department of Health, Kinesiology, and Applied Physiology, Concordia University, Montreal, QC, Canada*
2. *Centre de Recherche de l'Institut Universitaire de Gériatrie de Montréal, CIUSSS Centre-Sud-de-l'Île-de-Montréal, QC, Canada*
3. *Department of Psychology & Centre for Clinical Research in Health, Concordia University, Montreal, QC, Canada*
4. *Department of Epidemiology, Biostatistics and Occupational Health, McGill University, Montreal, QC, Canada*
5. *EA4075 IRISSE - Département STAPS, Université de La Réunion, France*
6. *PERFORM center, Concordia University, Montreal, QC, Canada*
7. *Axe maladies chroniques, Centre de recherche du CIUSSS du Nord-de-l'Île-de-Montréal, QC, Canada*

*\* These authors contributed equally*

*\*\* Corresponding author*

## Supplemental Results

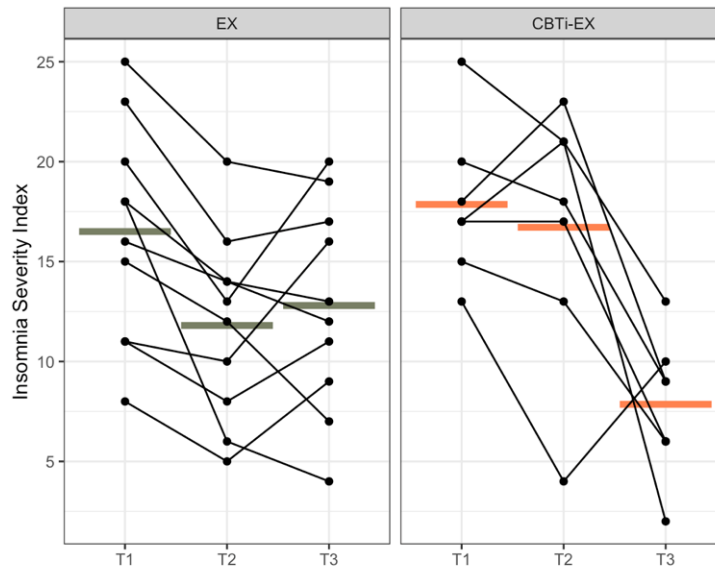

**Figure S1 – Change in insomnia severity**

*Individual changes (black line) and mean (green and orange bars) ISI score at baseline (T1), 8-weeks post-randomization (T2) and 16-weeks post-randomization (T3) for the EX group (left panel; N=8) and CBTi-EX group (right panel; N=6)*

**Table S1 – Change in cardiorespiratory fitness**

| <b>EX Group</b>           |              |                 |                 | <b>CBTi-EX Group</b>      |              |                   |                 |
|---------------------------|--------------|-----------------|-----------------|---------------------------|--------------|-------------------|-----------------|
| <b>Participant Number</b> | <b>T1</b>    | <b>T2</b>       | <b>T3</b>       | <b>Participant Number</b> | <b>T1</b>    | <b>T2</b>         | <b>T3</b>       |
| E1                        | 20.4         | 21.8            | NA <sup>1</sup> | C11                       | 21.6         | 20.8              | NA <sup>4</sup> |
| E2                        | 23.3         | 29.5            | 25.3            | C12                       | 43.2         | 40.5              | 44              |
| E3                        | 14.6         | 18.8            | NA <sup>1</sup> | C13                       | 19           | 16.4              | 16.9            |
| E4                        | 13.2         | 20.9            | 20.1            | C14                       | 14.7         | 14.8              | 17              |
| E5                        | 25.5         | 27.3            | 28.4            | C15                       | 17.6         | 16.3              | 14.8            |
| E6                        | 28.7         | 26.6            | 28              | C16                       | 19.3         | 17.6              | 19.7            |
| E7                        | 27.2         | 29.7            | 34.6            | C17                       | 13.5         | 14.6              | 16.9            |
| E8                        | 13.3         | 14.3            | NA <sup>3</sup> | C18                       | 25.2         | 25.2              | NA <sup>5</sup> |
| E9                        | 11           | NA <sup>2</sup> | NA <sup>2</sup> | C19                       | 23.6         | 32.2 <sup>6</sup> | 27.4            |
| E10                       | 18.6         | NA <sup>2</sup> | 24.7            | <i>Mean</i>               | <i>21.97</i> | <i>22.04</i>      | <i>22.39</i>    |
| <i>Mean</i>               | <i>19.58</i> | <i>23.6125</i>  | <i>26.85</i>    | <i>SD</i>                 | <i>8.83</i>  | <i>9</i>          | <i>10.38</i>    |
| <i>SD</i>                 | <i>6.41</i>  | <i>5.54</i>     | <i>4.82</i>     |                           |              |                   |                 |

*Individual changes and mean (± SD) for VO<sub>2</sub> peak (ml/kg/min) at baseline (T1), 8-weeks post-randomization (T2) and 16-weeks post-randomization (T3) for the EX group (left panel) and CBTi-EX group (right panel)*

*NA<sup>1</sup>- Could not come in for CPET for medical reasons*

*NA<sup>2</sup>- Could not come in for CPET due to COVID quarantine*

*NA<sup>3</sup>- Could not come in for CPET due to personal reasons*

*NA<sup>4</sup>- Did not exercise from T2- T3 due to lack of accessibility. Was not included in any analyses.*

*NA<sup>5</sup>- Could not come in for CPET due to COVID quarantine*

*<sup>6</sup>-CPET conducted outside the time window prescribed by the protocol (9 months instead of 8-weeks) due to COVID restrictions*

**Table S2 – Change in objective sleep (PSG-related measures).**

| PSG measures                           | T1           | T2           | T3           | Group*Time effect | Group effect  | Time effect   |
|----------------------------------------|--------------|--------------|--------------|-------------------|---------------|---------------|
| <i>Sleep Efficiency (%)</i>            |              |              |              |                   |               |               |
| EX                                     | 75.5 ± 11.5  | 76.1 ± 11.8  | 68.0 ± 5.2   | S(2,26) =2.8      | S(1,13) =3.7  | S(2,26) =3.2  |
| CBTi-EX                                | 82.2 ± 14.8  | 78.4 ± 11.8  | 80.7 ± 11.1  | p=.24             | p=.054        | p=.19         |
| <i>Total Sleep Time (min)</i>          |              |              |              |                   |               |               |
| EX                                     | 357.1 ± 73.6 | 343.0 ± 50.2 | 316.3 ± 46.6 | F(2,26) =0.52     | F(1,13) =0.65 | F(2,26) =0.67 |
| CBTi-EX                                | 365.0 ± 76.5 | 344.6 ± 62.7 | 358.1 ± 61.4 | p=.6              | p=.43         | p=.51         |
| <i>Sleep Onset Latency (min)</i>       |              |              |              |                   |               |               |
| EX                                     | 13.6 ± 15.9  | 19.0 ± 23.4  | 16.9 ± 12.4  | S(2,26) =0.75     | S(1,13) =1.21 | S(2,26) =1.89 |
| CBTi-EX                                | 14.0 ± 6.3   | 24.3 ± 19.5  | 27.3 ± 34.5  | p=.68             | p=.27         | p=.38         |
| <i>Wake After Sleep Onset (min)</i>    |              |              |              |                   |               |               |
| EX                                     | 86.6 ± 54.9  | 84.7 ± 53.3  | 108.7 ± 62.3 | F(2,26) =0.34     | F(1,13) =4.8  | F(2,26) =0.36 |
| CBTi-EX                                | 61.8 ± 59.2  | 51.9 ± 29.4  | 56.5 ± 17.6  | p=.71             | p=.05         | p=.7          |
| <i>Sleep Fragmentation Index (SFI)</i> |              |              |              |                   |               |               |
| EX                                     | 12.3 ± 6.9   | 13.4 ± 5.5   | 12.8 ± 6.8   | F(2,26) =1.2      | F(1,23) =0.3  | F(2,26) =0.6  |
| CBTi-EX                                | 11.1 ± 2.8   | 10.4 ± 3.0   | 12.3 ± 3.6   | p=.3              | p=.55         | p=.54         |
| <i>Mean SpO2</i>                       |              |              |              |                   |               |               |
| EX                                     | 90.4 ± 14.8  | 95.3 ± 1.1   | 94.2 ± 3.2   | F(2,26) =0.38     | F(1,13) =0.37 | F(2,26) =0.51 |
| CBTi-EX                                | 95 ± 1.1     | 95.4 ± 1.2   | 94.6 ± 0.6   | p=.56             | p=.55         | p=.5          |
| <i>SpO2 &lt;90 (%)</i>                 |              |              |              |                   |               |               |
| EX                                     | 5.7 ± 15.3   | 0.52 ± 0.68  | 11.3 ± 29.9  | F(2,26) =0.27     | F(1,13) =0.24 | F(2,26) =0.44 |
| CBTi-EX                                | 1.99 ± 3.9   | 2.2 ± 4.4    | 4.34 ± 4.7   | p=.66             | p=.63         | p=.55         |

*Mean (±SD) PSG-extracted measures at baseline (T1), 8-weeks post-randomization (T2) and 16-weeks post-randomization (T3); CBTi-EX N=7, EX N=8*

**Table S3 – Change in self-reported sleep quality and sleepiness.**

| Questionnaires | T1         | T2         | T3                | Group*Time effect | Group effect  | Time effect          |
|----------------|------------|------------|-------------------|-------------------|---------------|----------------------|
| <i>PSQI</i>    |            |            |                   |                   |               |                      |
| EX             | 10.8 ± 3.3 | 10.5 ± 3.9 | <b>7.7 ± 2.7*</b> | F(2,22) =0.13     | F(1,11) =2.8  | <b>F(2,22) =0.13</b> |
| CBTi-EX        | 8.5 ± 3.1  | 8.8 ± 3.3  | <b>5 ± 1.6*</b>   | p=.87             | p=.11         | <b>p=.003*</b>       |
| <i>ESS</i>     |            |            |                   |                   |               |                      |
| EX             | 10.5 ± 4.6 | 7.75 ± 4.3 | 8.5 ± 5.8         | F(2,24) =1.36     | F(1,12) =0.55 | F(2,24) =1.84        |
| CBTi-EX        | 11.33 ± 5  | 11.5 ± 5.9 | 9.83 ± 6.2        | p=.27             | p=.47         | p=.18                |

Mean ( $\pm$ SD) scores at baseline (T1), 8-weeks post-randomization (T2) and 16-weeks post-randomization (T3); *PSQI* CBTi-EX N=6, EX N=7; *ESS* CBTi-EX N=6, EX N=8  
*PSQI*, Pittsburgh Sleep Quality Index; *ESS*, Epworth Sleepiness Scale
